# Supplementary material for: Responsible Translation of Stem Cell Research: An Assessment of Clinical Trial Registration and Publications
Source: PubMed Central journal article supplement (PMC5425617; doi:10.1016/j.stemcr.2017.03.013), 2017-04-13
Supplement: mmc1.pdf [file mmc1.pdf]

**Stem Cell Reports, Volume 8**

**Supplemental Information**

**Responsible Translation of Stem Cell Research: An Assessment of  
Clinical Trial Registration and Publications**

**Moses Fung, Yan Yuan, Harold Atkins, Qian Shi, and Tania Bubela**

# Supplemental Materials for

## Responsible translation of stem cell research: an assessment of clinical trial registration and publications

**Authors:** Moses Fung<sup>1,2</sup>, Yan Yuan<sup>1</sup>, Harold Atkins<sup>3</sup>, Qian Shi<sup>1</sup>, Tania Bubela<sup>1\*</sup>

**Affiliations:**

<sup>1</sup> School of Public Health, Edmonton Clinic Health Academy; University of Alberta; Edmonton, Alberta, T6G 1C9; Canada

<sup>2</sup> Faculty of Medicine & Dentistry; University of Alberta; Edmonton, Alberta, T6G 2R7; Canada

<sup>3</sup> Ottawa Hospital Research Institute; University of Ottawa; Ottawa, Ontario, K1H 8L6; Canada

\*Corresponding author. Email: [tbubela@ualberta.ca](mailto:tbubela@ualberta.ca)

**This document file includes:**

Figs. S1 to S3

Tables S1 to S5

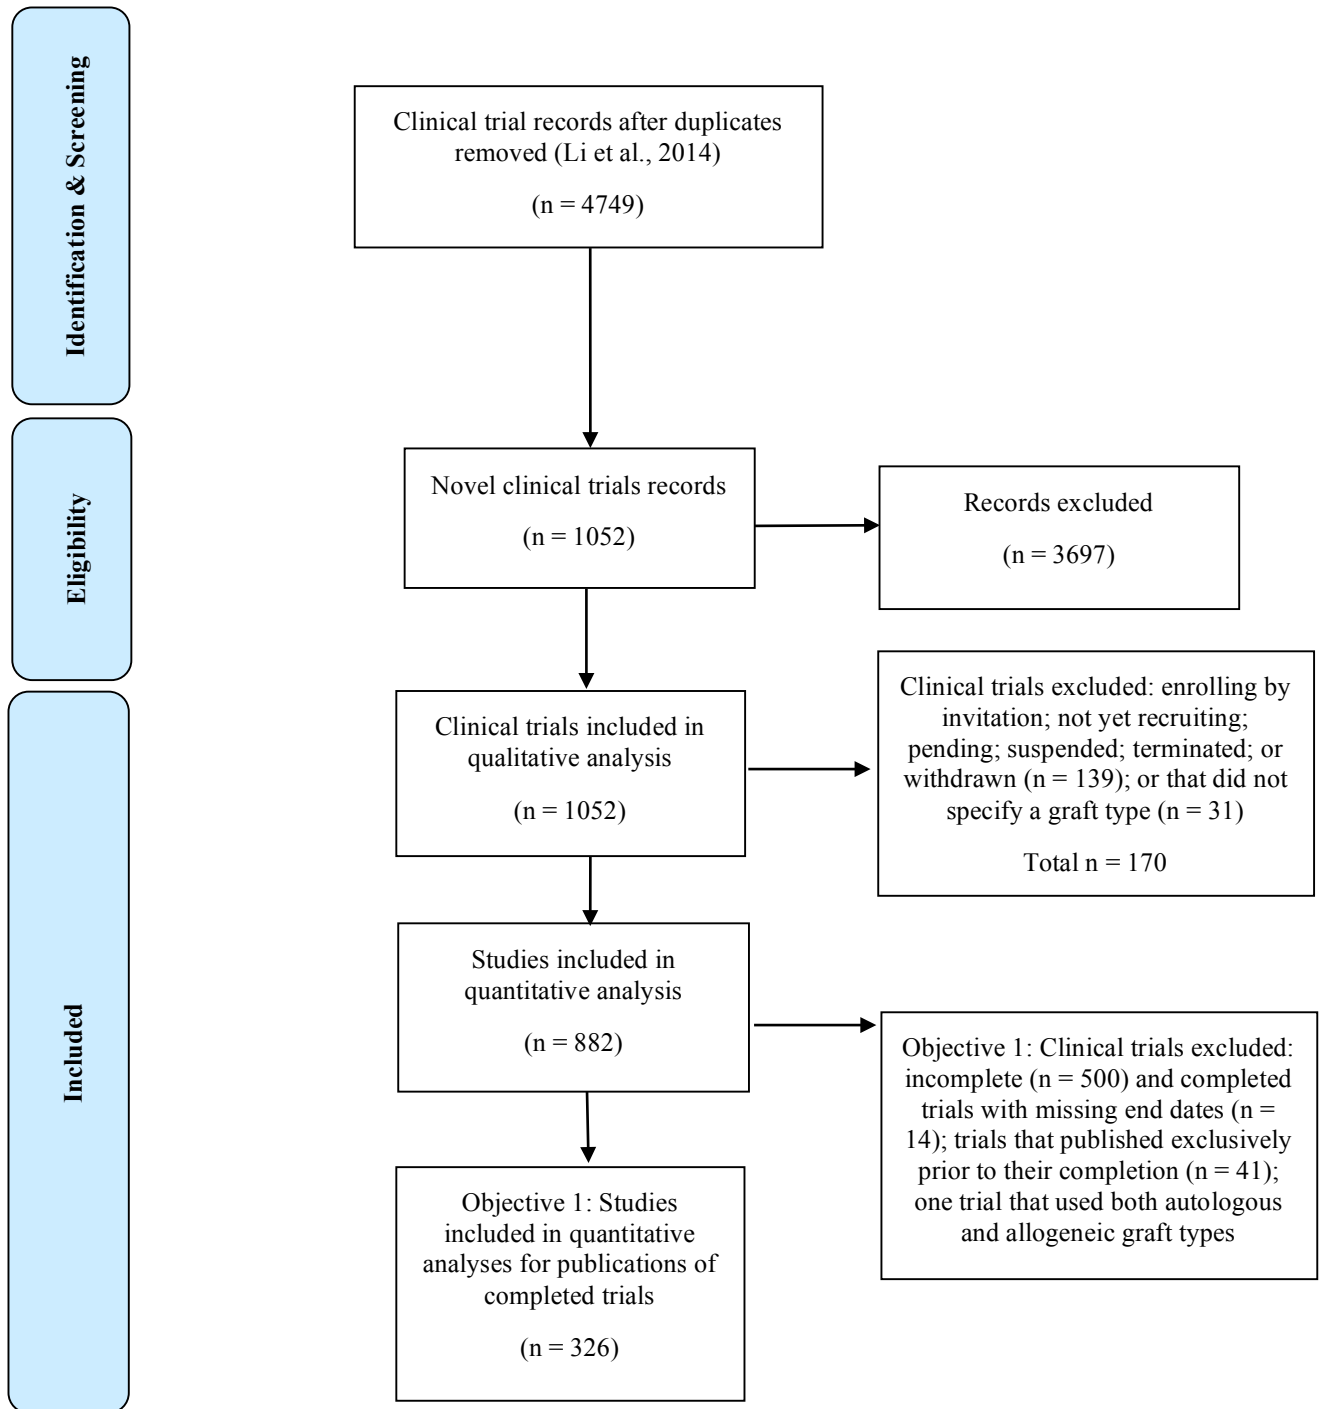

**Fig. S1a.**

Modified PRISMA Flow Diagram for Clinical Trials.

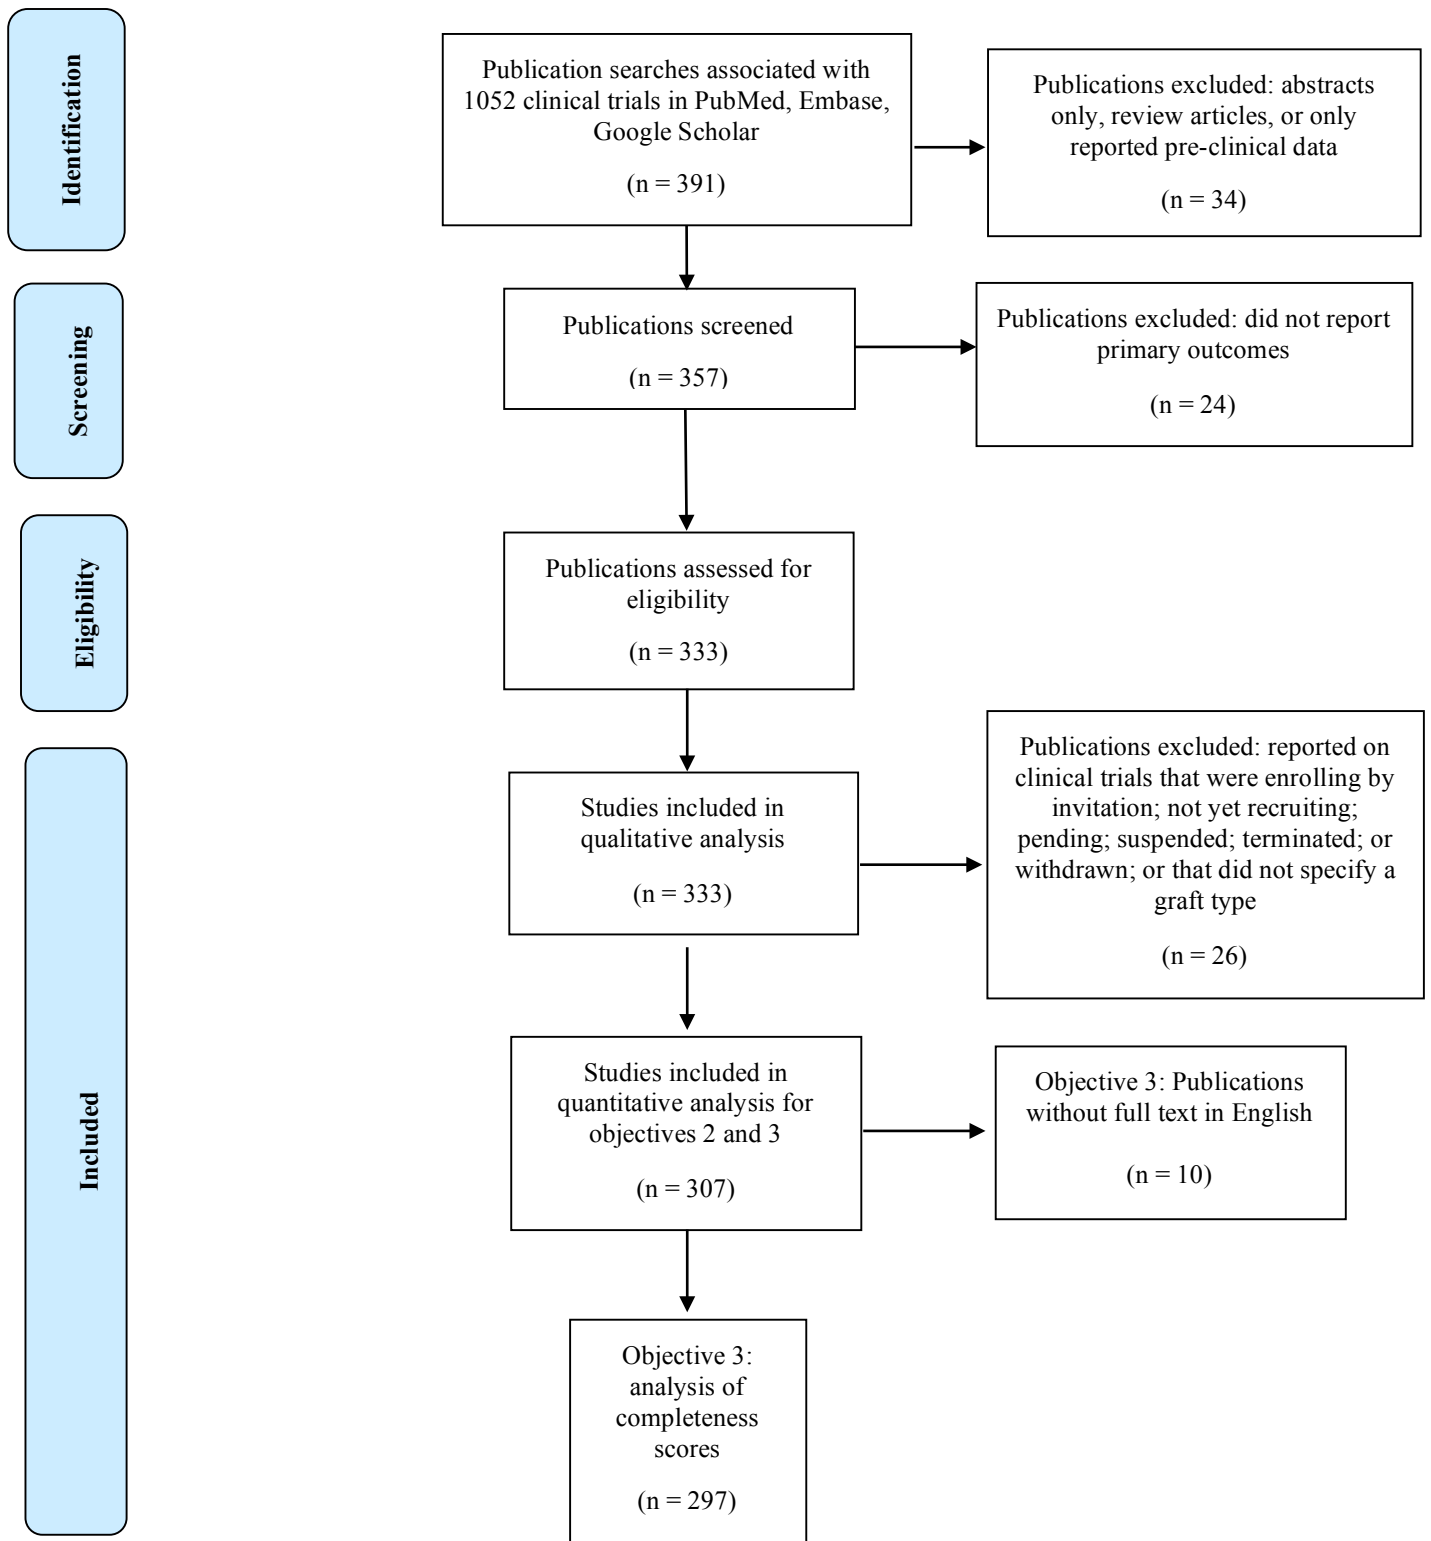

**Fig. S1b.**

Modified PRISMA Flow Diagram for Clinical Trial Publications.

**Table S1.** Characteristics of clinical trials registered by clinics that provide unproven cell therapies to patients. No results have been published.

| Clinic Name                    | Country                 | Clinical trial number (Phase) | Participants (enrollment) | Intervention                                       | Conditions                                        | Start date |
|--------------------------------|-------------------------|-------------------------------|---------------------------|----------------------------------------------------|---------------------------------------------------|------------|
| Adistem                        | Philippines             | NCT00703599 (1/2)             | 30 (Child)                | Autologous Adipose-derived Stem cells              | Type I Diabetes                                   | Nov-07     |
|                                |                         | NCT00703612 (1/2)             | 34 (Adult)                |                                                    | Type II Diabetes                                  | Nov-07     |
| Ageless Regenerative Institute | United States - Florida | NCT01453751 (1/2)             | 500 (Adult)               | Adipose-Derived Stem Cell Therapy                  | Diabetes Mellitus Type II                         | Mar-14     |
|                                |                         | NCT01559051 (1/2)             | 200 (Adult)               |                                                    | Chronic Obstructive Pulmonary Disease             | Mar-14     |
|                                |                         | NCT01739504 (1/2)             | 500 (Adult)               |                                                    | Osteoarthritis                                    | Mar-14     |
|                                |                         | NCT02087397 (1/2)             | 500 (Adult)               |                                                    | Erectile Dysfunction                              | Mar-14     |
|                                |                         | NCT02099500 (1/2)             | 200 (Adult)               |                                                    | Critical Limb Ischemia                            | Mar-14     |
|                                |                         | NCT01453764 (1/2)             | 10 (Adult)                |                                                    | Multiple Sclerosis                                | Oct-14     |
|                                |                         | NCT01453777 (1/2)             | 10 (Adult)                |                                                    | Brain Lesion (General)                            | May-11     |
|                                |                         | NCT01453803 (1/2)             | 10 (Adult)                |                                                    | Parkinson's Disease                               | May-11     |
|                                |                         | NCT01453816 (1/2)             | 10 (Adult)                |                                                    | Renal Failure                                     | May-11     |
|                                |                         | NCT01453829 (1/2)             | 10 (Adult)                |                                                    | Stroke                                            | Oct-14     |
|                                |                         | NCT01501461 (1/2)             | 10 (Adult)                |                                                    | Frailty Syndrome                                  | May-11     |
|                                |                         | NCT01502488 (1/2)             | 10 (Child)                |                                                    | Autism                                            | Oct-14     |
|                                |                         | NCT01502501 (1/2)             | 10 (Adult)                |                                                    | Non-Ischemic Congestive Heart Failure             | May-11     |
|                                |                         | NCT01502514 (1/2)             | 10 (Adult)                |                                                    | Ischemic Congestive Heart Failure                 | May-11     |
| NCT01974128 (1/2)              | 10 (Adult)              | Acute Myocardial Infarction   | Oct-14                    |                                                    |                                                   |            |
| Bieke Biotech                  | India                   | NCT00922389 (1/2)             | 36 (Adult)                | Peripheral Blood Derived Mononuclear Cells         | Diabetic Foot, Critical Limb Ischemia, Leg Ulcers | Jul-09     |
| Shenzhen Beike Bio-Technology  | China                   | NCT01539902 (2)               | 25 (Both)                 | Human Umbilical Cord Derived Mesenchymal Stem Cell | Lupus Nephritis                                   | Feb-12     |
|                                |                         | NCT01742533 (1/2)             | 40 (Adult)                |                                                    | Premature Ovarian Failure                         | Mar-12     |
|                                |                         | NCT01343511 (1/2)             | 37 (Child)                |                                                    | Autism                                            | Mar-09     |
|                                |                         | NCT01342250 (1/2)             | 20 (Adult)                |                                                    | Liver Cirrhosis                                   | Oct-10     |
|                                |                         | NCT01360164 (1/2)             | 20 (Both)                 |                                                    | Hereditary Ataxia                                 | Jan-10     |
|                                |                         | NCT01364246 (1/2)             | 20 (Adult)                |                                                    | Progressive Multiple Sclerosis, Neuromyelitis     | Jan-10     |
|                                |                         | NCT01443689 (1/2)             | 20 (Adult)                |                                                    | Optica                                            | Jul-11     |
|                                |                         | NCT01610440 (1/2)             | 15 (Child)                |                                                    | Burns<br>Duchenne Muscular Dystrophy              | Oct-11     |
| Bioheart                       | United States - Florida | NCT00050765 (1)               | 15 (Adult)                | Autologous Myoblasts (Myocell)                     | Congestive Heart Failure, Myocardial Infarction   | Aug-06     |
|                                |                         | NCT00054678 (1)               | 20 (Adult)                |                                                    |                                                   | Feb-03     |
|                                |                         | NCT00375817 (2)               | 40 (Adult)                |                                                    | Nov-05                                            |            |
|                                |                         | NCT00526253 (2/3)             | 170 (Adult)               |                                                    | Congestive Heart Failure, Myocardial Infarction   | Sep-07     |

|                                                 |                                     |                            |             |                                                                                            |                                       |                                                     |                         |
|-------------------------------------------------|-------------------------------------|----------------------------|-------------|--------------------------------------------------------------------------------------------|---------------------------------------|-----------------------------------------------------|-------------------------|
|                                                 |                                     | NCT02024269 (?)            | 100 (Adult) | Adipose-derived stem cells                                                                 | Dry Macular Degeneration              | Dec-13                                              |                         |
|                                                 |                                     | NCT02041000 (?)            | 100 (Adult) |                                                                                            | Chronic Obstructive Pulmonary Disease | Jan-14                                              |                         |
|                                                 |                                     | NCT02097862 (?)            | 100 (Adult) |                                                                                            | Degenerative Disk Disease             | Mar-14                                              |                         |
| Institute of Regenerative and Cellular Medicine | United States - California          | NCT01947348 (?)            | 30 (Adult)  | A3 SVF (Stromal Vascular Fraction)                                                         | Osteoarthritis                        | Sep-12                                              |                         |
|                                                 |                                     | NCT01947348 (?)            | 30 (Adult)  |                                                                                            |                                       | Sep-12                                              |                         |
|                                                 |                                     | NCT01947348 (?)            | 30 (Adult)  |                                                                                            |                                       | Sep-12                                              |                         |
| NueroVita Clinic                                | Russia                              | NCT01759810 (2/3)          | 60 (Adult)  | Dendritic vaccine, allogeneic & autologous hematopoietic stem cells, cytotoxic lymphocytes | Glioblastoma                          | Dec-12                                              |                         |
|                                                 |                                     | NCT01759810 (2/3)          | 60 (Adult)  |                                                                                            |                                       | Glioblastoma                                        | Dec-12                  |
|                                                 |                                     | NCT01782274 (2/3)          | 60 (Adult)  |                                                                                            |                                       | Neoplasm Metastasis                                 | Dec-12                  |
|                                                 |                                     | NCT01782274 (2/3)          | 60 (Adult)  |                                                                                            |                                       | Neoplasm Metastasis                                 | Dec-12                  |
|                                                 |                                     | NCT01782287 (2/3)          | 60 (Adult)  |                                                                                            |                                       | Neoplasm Metastasis                                 | Dec-12                  |
|                                                 |                                     | NCT01782287 (2/3)          | 60 (Adult)  |                                                                                            |                                       | Neoplasm Metastasis                                 | Dec-12                  |
| NuroGeneration                                  | United States - California          | NCT01329926 (0)            | 20 (Adult)  | Adult Human-derived Neural Stem Cells                                                      | Parkinson's Disease                   | Jun-11                                              |                         |
| TheraVitae                                      | Canada, Israel, Thailand, Hong Kong | NCT00416663 (1/2)          | 10 (Adult)  | Angiogenic Cell Precursors (ACPs) or Vescell TM                                            | Angina pectoris                       | Aug-07                                              |                         |
|                                                 |                                     | NCT00523224 (1)            | 5 (Adult)   |                                                                                            |                                       | Congestive Heart Failure                            | Sep-07                  |
|                                                 |                                     | NCT00523731 (1)            | 6 (Adult)   |                                                                                            |                                       | Peripheral Arterial Disease, Critical Limb Ischemia | Mar-07                  |
|                                                 |                                     | NCT00384514 (2)            | 24 (Adult)  |                                                                                            |                                       |                                                     | Coronary Artery Disease |
| XCell-Center                                    |                                     | EUCTR2010-024391-25-CZ (2) | 88 (Adult)  | ASCT01 (Bone Marrow Derived Stem Cells)                                                    | Critical limb Ischemia                | May-11                                              |                         |

**Table S2.** Characteristics of publications of 326 completed novel stem cell clinical trials associated with publication.

| Characteristic                                  | % Published (n) | Hazards Ratio | 95% Confidence Interval for Hazard Ratio | p-value      |
|-------------------------------------------------|-----------------|---------------|------------------------------------------|--------------|
| <b>Sponsor</b>                                  |                 |               |                                          |              |
| Industry (reference group)                      | 41.05 (95)      |               |                                          |              |
| Public sector                                   | 36.80 (231)     | 1.93‡         | (1.03,3.61)                              | <b>0.04</b>  |
| <b>Phase</b>                                    |                 |               |                                          |              |
| Phase I,Phase I Phase II (reference group)      | 40.39 (151)     | 1             | -                                        |              |
| Phase II, Phase II Phase III                    | 40.50 (79)      | 0.93          | (0.60,1.45)                              | 0.75         |
| Phase III, Phase III Phase IV                   | 25.00 (12)      | 0.49          | (0.15,1.60)                              | 0.24         |
| Phase IV                                        | 58.33 (12)      | 1.98          | (0.77,5.05)                              | 0.15         |
| N/A, Phase 0                                    | 29.17 (72)      | 0.75          | (0.44,1.24)                              | 0.27         |
| <b>Graft type</b>                               |                 |               |                                          |              |
| Allogeneic (reference group)                    | 29.76 (84)      | 1             | -                                        |              |
| Autologous                                      | 43.82 (178)     | 1.42          | (0.85,2.39)                              | 0.19         |
| No graft product                                | 32.81 (64)      | 1.10          | (0.51,2.38)                              | 0.81         |
| <b>Cell type<sup>a</sup></b>                    |                 |               |                                          |              |
| Mesenchymal (reference group)                   | 35.59 (118)     | 1             | -                                        |              |
| CD34+ fraction                                  | 37.50 (24)      | 0.65          | (0.30,1.40)                              | 0.27         |
| Endothelial progenitor                          | 33.33 (30)      | 0.68          | (0.25,1.86)                              | 0.46         |
| Hematopoietic                                   | 35.48 (62)      | 0.82          | (0.45,1.49)                              | 0.51         |
| Mononuclear fraction                            | 64.52 (31)      | 2.35          | (1.32,4.21)                              | <b>0.004</b> |
| Combination                                     | 62.50 (16)      | 1.79          | (0.88,3.67)                              | 0.11         |
| Others                                          | 24.44 (45)      | 0.64          | (0.32,1.28)                              | 0.21         |
| <b>Country<sup>b</sup></b>                      |                 |               |                                          |              |
| Medium-High Human Development (reference group) | 36.90 (84)      |               |                                          |              |
| Very High Human Development                     | 38.43 (242)     | 1.34          | (0.87,2.09)                              | 0.18         |

‡ The hazard ratio for Public sector vs. Industry sponsored trials is time varying. The number shown here is the estimated hazard ratio at 1 year (from the end of the trial).

<sup>a</sup> Cell types: Hematopoietic cell refers to a graft collected directly from patients used without modification (other than possible cryopreservation and thawing). Mononuclear fraction refers to a hematopoietic cell product purified by density gradient separation or other means that removes granulocytes and red blood cells. CD34+ fraction refers to hematopoietic cell products that underwent purification using a monoclonal antibody to CD34. All these products contain hematopoietic stem cells (HSC) and are used for hematopoietic engraftment. The other category includes: studies using neural precursors or stem cells (n=24), CD133 purified HSC or angiogenic cell precursor populations (n=22), limbal stem cells (n=16), cell products derived from embryonic stem cell (n=6), cardiac cells (n=6), products used in 4 or fewer trials (n=43), and trials in which the stem cell product was not specified (n=20). Specific cell products used in <4 trials included: adrenocortical, bone progenitor, chondrocytes, fibroblasts or fibrocytes, germ cells, oral mucosa and dental cells, pancreatic islet precursors, placental skeletal muscle, and skin or hair follicle stem or precursor cell products.

<sup>b</sup> Countries were classified according to the United Nations Development Programme: Human Development Index – Country Profiles (<http://hdr.undp.org/en/countries>)

**Table S3.** Characteristics of publications on novel stem cell clinical trials associated with the completeness score for reporting using the Generalized Estimating Equation (GEE) method.

| Characteristic                                            | Estimate | 95% Confidence Interval |
|-----------------------------------------------------------|----------|-------------------------|
| <b>Intercept</b>                                          | 15.76    | 14.27 to 17.24          |
| <b>Journal Impact Factor (5 Year)</b>                     |          |                         |
| <30th percentile [0-2.977] (reference group)              | 0        | -                       |
| 30th-70th percentile [2.977-3.883]                        | 1.76     | 0.76 to 2.76            |
| > 70th percentile [3.883-41.541]                          | 3.14     | 2.06 to 4.21            |
| <b>Year of publication</b>                                |          |                         |
| After 2011 (reference group)                              | 0        | -                       |
| Before 2011                                               | -0.02    | -0.87 to 0.84           |
| <b>Country</b>                                            |          |                         |
| Medium-High Human Development Countries (reference group) | 0        | -                       |
| Very High Human Development Countries                     | -0.73    | -1.69 to 0.23           |
| <b>Clinical Trial Status</b>                              |          |                         |
| Completed, Active not recruiting etc. (reference group)   | 0        | -                       |
| Recruitment ongoing                                       | -2.59    | -4.14 to -1.04          |
| Unknown                                                   | -0.36    | -1.38 to 0.66           |
| <b>Sponsor</b>                                            |          |                         |
| Industry (reference group)                                | 0        | -                       |
| Public sector                                             | -1.51    | -2.52 to -0.50          |
| <b>Phase</b>                                              |          |                         |
| Phase I, Phase I Phase II (reference group)               | 0        | -                       |
| Phase II, Phase II Phase III                              | 0.90     | -0.07 to 1.88           |
| Phase III, Phase III Phase IV                             | -1.06    | -2.49 to 0.38           |
| Phase IV                                                  | 1.31     | 0.06 to 2.56            |
| N/A, Phase 0                                              | 1.25     | -0.49 to 3.00           |
| <b>Graft type</b>                                         |          |                         |
| Allogeneic (reference group)                              | 0        | -                       |
| Autologous                                                | 1.48     | 0.22 to 2.73            |
| No graft product                                          | 2.02     | 0.28 to 3.76            |
| <b>Cell type*</b>                                         |          |                         |
| Mesenchymal (reference group)                             | 0        | -                       |
| CD34+ fraction                                            | -0.43    | -1.72 to 0.87           |
| Endothelial progenitor                                    | -3.02    | -4.49 to -1.54          |
| Hematopoietic                                             | -0.74    | -2.06 to 0.57           |
| Mononuclear fraction                                      | -1.71    | -3.12 to -0.29          |
| Combination                                               | -0.89    | -2.74 to 0.96           |
| Others                                                    | -1.56    | -3.12 to 0.00           |

\* Cell types: Hematopoietic cell refers to a graft collected directly from patients used without modification (other than possible cryopreservation and thawing). Mononuclear fraction refers to a hematopoietic cell product purified



by density gradient separation or other means that removes granulocytes and red blood cells. CD34+ fraction refers to hematopoietic cell products that underwent purification using a monoclonal antibody to CD34. All these products contain hematopoietic stem cells (HSC) and are used for hematopoietic engraftment. The other category includes: studies using neural precursors or stem cells (n=24), CD133 purified HSC or angiogenic cell precursor populations (n=22), limbal stem cells (n=16), cell products derived from embryonic stem cell (n=6), cardiac cells (n=6), products used in 4 or fewer trials (n=43), and trials in which the stem cell product was not specified (n=20). Specific cell products used in <4 trials included: adrenocortical, bone progenitor, chondrocytes, fibroblasts or fibrocytes, germ cells, oral mucosa and dental cells, pancreatic islet precursors, placental skeletal muscle, and skin or hair follicle stem or precursor cell products.

**Table S4.** Characteristics of reported criteria (background, methods and other) for published novel stem cell clinical trials adapted from CONSORT and ICH E3 Guidelines.

| <b>Criterion Adapted from CT Reporting Guidelines</b>                                    | <b>Reported</b>                                                                                                                                                  | <b>Partially Reported</b>                                                                                                                                               | <b>Not Reported</b>                                                          |
|------------------------------------------------------------------------------------------|------------------------------------------------------------------------------------------------------------------------------------------------------------------|-------------------------------------------------------------------------------------------------------------------------------------------------------------------------|------------------------------------------------------------------------------|
| 1. Background                                                                            | Relevant background and rationale reported.                                                                                                                      | Background and rationale not clearly explained.                                                                                                                         | No information on background or rationale reported.                          |
| <b>Methods</b>                                                                           |                                                                                                                                                                  |                                                                                                                                                                         |                                                                              |
| 2. Trial Phase                                                                           | Phase of the trial or stage of research if pilot study reported.                                                                                                 | Not Applicable.                                                                                                                                                         | Phase or stage of the trial not reported.                                    |
| 3. Trial Design                                                                          | Description of trial design (e.g., parallel, factorial), including allocation ratio and important changes to methods after trial commencement, if necessary.     | Incomplete description of trial design, including allocation ratio, or incomplete reporting of important changes to methods.                                            | Trial design not reported.                                                   |
| 4. Participant Criteria                                                                  | Eligibility (inclusion and exclusion) criteria for participants, settings and locations of data collection reported.                                             | Incomplete eligibility criteria for participants, or missing information on settings and locations of data collection.                                                  | Eligibility criteria for participants not reported.                          |
| 5. Interventions                                                                         | Interventions for each group reported with sufficient detail to allow replication, including how and when they were administered (or recorded as observational). | Interventions for each group partially reported without sufficient detail to allow replication, or lacking information on how and when interventions were administered. | No information on interventions reported.                                    |
| 6. Primary Outcome                                                                       | Defines pre-specified primary outcome measure(s), including how and when they are assessed.                                                                      | Defines primary and secondary outcome measures, but reports no information on how and when they are assessed.                                                           | No information on outcome measures reported.                                 |
| 7. Secondary Outcome                                                                     | Defines pre-specified or ad-hoc secondary outcome measure(s), including how and when they are assessed.                                                          | Defines secondary outcome measures, but reports no information on how and when they are assessed.                                                                       | No information on outcome measures reported.                                 |
| 8. Sample Size Estimation                                                                | Planned sample size method for its determination reported.                                                                                                       | Planned sample size stated; method for determination of sample size not reported.                                                                                       | No information on sample size reported.                                      |
| 9. Randomization (Not applicable for non-randomized clinical trials)                     | Study identified as randomized, and reports type of randomization and method for random allocation.                                                              | Study identified as randomized but type of randomization or method for random allocation sequence not reported.                                                         | Study identified as randomized but no information on randomization reported. |
| 10. Blinding (Not applicable for phase I and II trials without a randomized control arm) | Study identified as blinded, blinded parties identified, and methods of blinding reported (or                                                                    | Study identified as blinded but blinded parties or method of blinding not reported.                                                                                     | Study identified as blinded but no information on blinding reported.         |

|                                   |                                                                                                                     |                                                                                                                                   |                                                                                                                                        |
|-----------------------------------|---------------------------------------------------------------------------------------------------------------------|-----------------------------------------------------------------------------------------------------------------------------------|----------------------------------------------------------------------------------------------------------------------------------------|
|                                   | study identified as open-labeled).                                                                                  |                                                                                                                                   |                                                                                                                                        |
| 11. Statistical Methods           | Statistical methods reported for comparison of groups of primary and secondary outcomes.                            | Statistical methods used not explicitly reported.                                                                                 | No statistical methods reported.                                                                                                       |
| <b>Results</b>                    |                                                                                                                     |                                                                                                                                   |                                                                                                                                        |
| 12. Participant Flow              | Reported number of participants assigned, treated and analysed, with diagram, including losses and exclusions.      | Missing information on number of participants assigned, treated and analysed, or number of patients lost or excluded.             | No information on participant flow reported.                                                                                           |
| 13. Recruitment Period            | Dates for recruitment and follow-up periods reported (month and year), including why trial stopped (if applicable). |                                                                                                                                   | Dates for recruitment and follow-up periods not reported.                                                                              |
| 14. Primary Endpoint              | Number of patients with events and % of analysis data set per group reported.                                       | Data insufficient to be included in meta-analysis.                                                                                | Multiple primary endpoints, without appropriate adjusting for multiple testing, contradictory information concerning primary endpoint. |
| 15. Harms/Side Effects            | Important harms or unintended effects reported.                                                                     |                                                                                                                                   | No information on harms or unintended effects reported.                                                                                |
| 16. Severity                      | Severity of harms reported in a table with a toxicity grade.                                                        |                                                                                                                                   | Severity of harms in a table with a toxicity grade not reported.                                                                       |
| 17. Deaths                        | Number of patients that died during the trial reported (if any).                                                    |                                                                                                                                   | Number of patients that died during the trial not reported.                                                                            |
| 18. Limitations                   | Trial limitations, addressing sources of potential bias, imprecision reported.                                      | Trial limitations not explicitly addressed.                                                                                       | No limitations reported.                                                                                                               |
| 19. Generalizability              | External validity and applicability of trial findings reported.                                                     | Generalizability of results not consistent with results, or not fully disclosed.                                                  | No inferences of generalizability reported.                                                                                            |
| 20. Interpretation                | Interpretation consistent with results, balancing benefits and harms and considering other relevant evidence.       | Interpretation not consistent with results, or missing balance of benefits and harms or consideration of other relevant evidence. | Interpretation not available.                                                                                                          |
| <b>Other</b>                      |                                                                                                                     |                                                                                                                                   |                                                                                                                                        |
| 21. Registration                  | Registration number and name of trial registry reported.                                                            | Mentioned as registered, but either number or registry not reported.                                                              | No registration reported.                                                                                                              |
| 22. Availability of Full Protocol | Accessible link to full trial protocol available (supplementary documents, other site) or                           |                                                                                                                                   | Full trial protocol not accessible.                                                                                                    |

---

|             |                                                |                                                    |
|-------------|------------------------------------------------|----------------------------------------------------|
|             | protocol reported in the paper.                |                                                    |
| 23. Funding | Sources of funding and other support reported. | Sources of funding and other support not reported. |

---

**Table S5.** Qualitative Criteria for Assessing the Safety and Efficacy of Reported Stem Cell Clinical Trials.

| Qualitative Assessment of Clinical Trial Reports | Definition                                                                                                                                                                                                                                                                                                                                                                                                                                                                                                                                                                                                                                                                                                        |
|--------------------------------------------------|-------------------------------------------------------------------------------------------------------------------------------------------------------------------------------------------------------------------------------------------------------------------------------------------------------------------------------------------------------------------------------------------------------------------------------------------------------------------------------------------------------------------------------------------------------------------------------------------------------------------------------------------------------------------------------------------------------------------|
| 1. Trial Status                                  | <p><u>In Progress</u>: interim report published.</p> <p><u>Completed</u>: clinical trial completed with results analysed and presented.</p> <p><u>Withdrawn</u>: halted prematurely, prior to enrollment of first patient:</p> <ul style="list-style-type: none"> <li>• Reasons given;</li> <li>• Reasons not given.</li> </ul> <p><u>Suspended</u>: recruiting or enrolling has halted prematurely but potentially will resume.</p> <p><u>Terminated</u>: recruiting or enrolling has halted prematurely and will not resume; participants are no longer being examined or treated:</p> <ul style="list-style-type: none"> <li>• Reasons given;</li> <li>• Reasons not given.</li> </ul>                         |
| 2. Presence of Serious Side Effects              | <p><u>Side Effects Observed</u>: organ system involved according to NCIC-CTY standard (e.g., hematopoietic, cardiac, gastrointestinal).</p> <p><u>No Severe Side Effects Observed</u>.</p> <p><u>Unknown</u>: Neither presence nor absence of side effects reported.</p>                                                                                                                                                                                                                                                                                                                                                                                                                                          |
| 3. Reported Expectation of Efficacy              | <p><u>Positive</u>: patient outcomes improved, results were statistically significant (<math>P &lt; 0.05</math>), or perceived to be striking or important, or have a positive direction of effect. Results may be unproven, but early results are promising.</p> <p><u>Neutral</u>: (a) no improvement, results were not statistically significant (<math>P &gt; 0.05</math>), or perceived to be unimportant, or showed null effect; (b) a mixture of positive and negative outcomes reported.</p> <p><u>Negative</u>: patients were worse off, current treatment is better than experimental treatment.</p> <p><u>Unknown</u>: Not known at this point in trial, not enough data, not explicitly reported.</p> |
| 4. Statements on Further Clinical Research       | <p><u>Yes</u>: authors advocate for continued study in this area.</p> <p><u>No</u>: authors advocate against continued study in this area.</p> <p><u>Unknown</u>: no explicit statement on continuation or the trial is still in progress.</p>                                                                                                                                                                                                                                                                                                                                                                                                                                                                    |
